# Supplementary material for: Experience of patients with breast cancer with traditional treatment and healers’ understanding of causes and manifestations of breast cancer in North Shewa zone, Ethiopia: a phenomenological study
Source: PubMed Central journal article supplement — BMJ Open. 2022 Dec 1;12(12):e063726. doi: 10.1136/bmjopen-2022-063726 (PMC9716934; doi:10.1136/bmjopen-2022-063726), 2022-12-01
Supplement: bmjopen-2022-063726supp001.pdf [file bmjopen-2022-063726supp001.pdf]

## Consent Form and Questionnaire

Dear,

I am ----- and currently working at Debre Berhan university. The aim of this study is assessing the experience of breast cancer patients on traditional treatment and healers' understanding of causes and clinical manifestations of breast cancer in North Shewa zone. Thus, this interview is prepared for this purpose to get appropriate information on the topic. The information that will be obtained using this interview will be used only for research purpose. Confidentiality and anonymity is fully assured, as your name is not required and only the research team will have access to the results.

It will not affect you in anyway, should you not take part in this study?

If yes continue to sign consent form      If No, stop here

I have been informed that the purpose of this study is assessing Experience of breast cancer patients on traditional treatment and healers' understanding of causes and clinical manifestations of breast cancer in North Shewa zone, Ethiopia. I have understood that participation in this study is entirely voluntarily. I have been told that my answer to the question will not be given to anyone else and no reports of this study identify me in any way. I understood that participation in this study does not involve risks. I understood that Alemayehu Gonie is a contact person if I have question about the study or about my right as a study participant.

Respondent's Signature \_\_\_\_\_ Date \_\_\_\_\_ Start interview.

Supervisor's name \_\_\_\_\_ signature \_\_\_\_\_

**Address of investigators:**    **Tell:** 0912379531    **e-mail:** [alemayehugonie19@gmail.com](mailto:alemayehugonie19@gmail.com)

**Instruction to the interviewer:** circle the number in front of the option based on the response

| Sr.       | Part I: Demographic characteristics of BC patients                                                                          | Options                                               |
|-----------|-----------------------------------------------------------------------------------------------------------------------------|-------------------------------------------------------|
| 1.        | Age in years                                                                                                                | -----                                                 |
| 2.        | Marital status                                                                                                              | 1= Married 2= unmarried                               |
| 3.        | Religion                                                                                                                    | 1. Muslim 2. Orthodox 3. Protestant                   |
| 4.        | Educational status                                                                                                          | 1= No Education 2. Primary 3. Secondary<br>4. College |
| 5.        | Occupational status                                                                                                         | 1. Housewife 2. Farmer 3. Merchant<br>4. Employed     |
| 6.        | Residence                                                                                                                   | 1=Urban 2= Rural                                      |
| <b>2.</b> | <b>Part II: Experiences of breast cancer patients about traditional medicine</b>                                            |                                                       |
| 7.        | How do you explain your breast cancer treatment?<br><br>Probe: Both traditional and modern treatment                        |                                                       |
| 8.        | How do you explain traditional healer and where did you heard about them?<br><br>Probe: How did you compare both treatments |                                                       |
| 9.        | Do you think that or believe traditional healers treat your cancer?<br><br>Probe: How?                                      |                                                       |
| 10.       | How do you explain the changes you recognize after you take traditional medicine from healer?                               |                                                       |
| <b>3.</b> | <b>Part I: Demographic Characteristics of the healer</b>                                                                    |                                                       |
| 1.        | Age                                                                                                                         | -----                                                 |
| 2.        | Sex of healer                                                                                                               | 1= Male 2= Female                                     |
| 3.        | Marital status                                                                                                              | 1= Married 2= unmarried                               |
| 4.        | Religion                                                                                                                    | 1. Muslim 2. Orthodox 3.<br>Protestant                |
| 5.        | Educational status                                                                                                          | 1. Housewife 2. Farmer<br>3. Merchant 4. employed     |

|                                                                                                   |                                                                                                                                                                |                                 |                          |
|---------------------------------------------------------------------------------------------------|----------------------------------------------------------------------------------------------------------------------------------------------------------------|---------------------------------|--------------------------|
| 6.                                                                                                | Occupational status                                                                                                                                            | 1= No Education<br>3. Secondary | 2. Primary<br>4. College |
| 7.                                                                                                | THs' treatment practice (in years)                                                                                                                             |                                 |                          |
| <b>Part II: Healers' perception in relation to cancer, its cause, and treatment effectiveness</b> |                                                                                                                                                                |                                 |                          |
| 8.                                                                                                | How did you start traditional treatment?                                                                                                                       |                                 |                          |
| 9.                                                                                                | What do you understand about BC, its cause,<br><br>Probe: risk factors                                                                                         |                                 |                          |
| 10.                                                                                               | What are sign & symptoms of BC?<br><br>Probe: Others                                                                                                           |                                 |                          |
| 11.                                                                                               | How BC pts contact you? How much of them?<br><br>Probe: How did you confirm treatment previously?                                                              |                                 |                          |
| 12.                                                                                               | After giving the treatment, do you follow the progress of healing?<br><br><b>Probe:</b> How do you follow? How many improved? If improved, how do you confirm? |                                 |                          |
| 13.                                                                                               | What are the treatment modalities you follow?<br><br>Probe: For how much day? Dose? Types?                                                                     |                                 |                          |
| 14.                                                                                               | Could you tell us, if you recognized side effects after you give the treatment?                                                                                |                                 |                          |

**Thank you for your participation!!!**
